# Supplementary material
Source: PubMed Central journal article supplement (PMC10528140)
Supplement: NIHMS1921119-supplement-1.pdf [file NIHMS1921119-supplement-1.pdf]

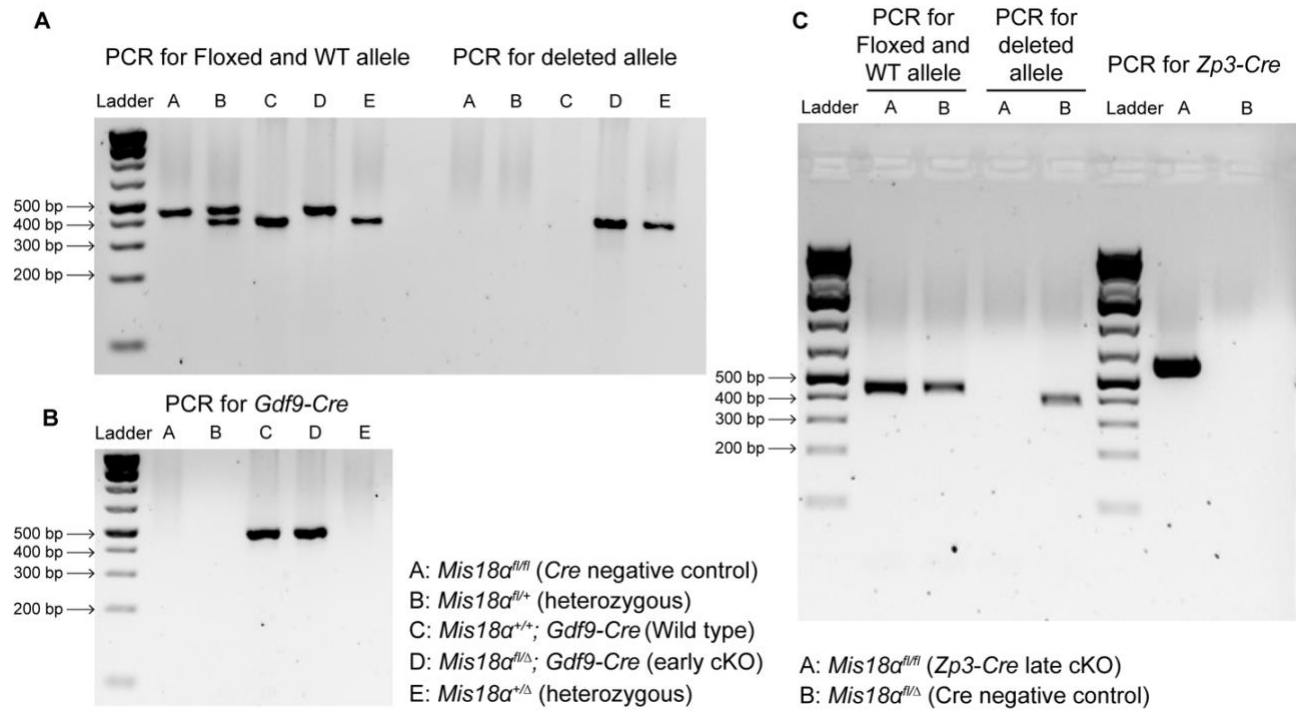

**Figure S1: Genotyping of mice used in this study. Related to Figure 1.**

(A-C) Genotyping gels for *Mis18α<sup>fl/fl</sup>* mice for both *Cre* drivers.

**Generating cKO females using *Gdf9-cre* (equivalent crosses were done for *Zp3-Cre*)**

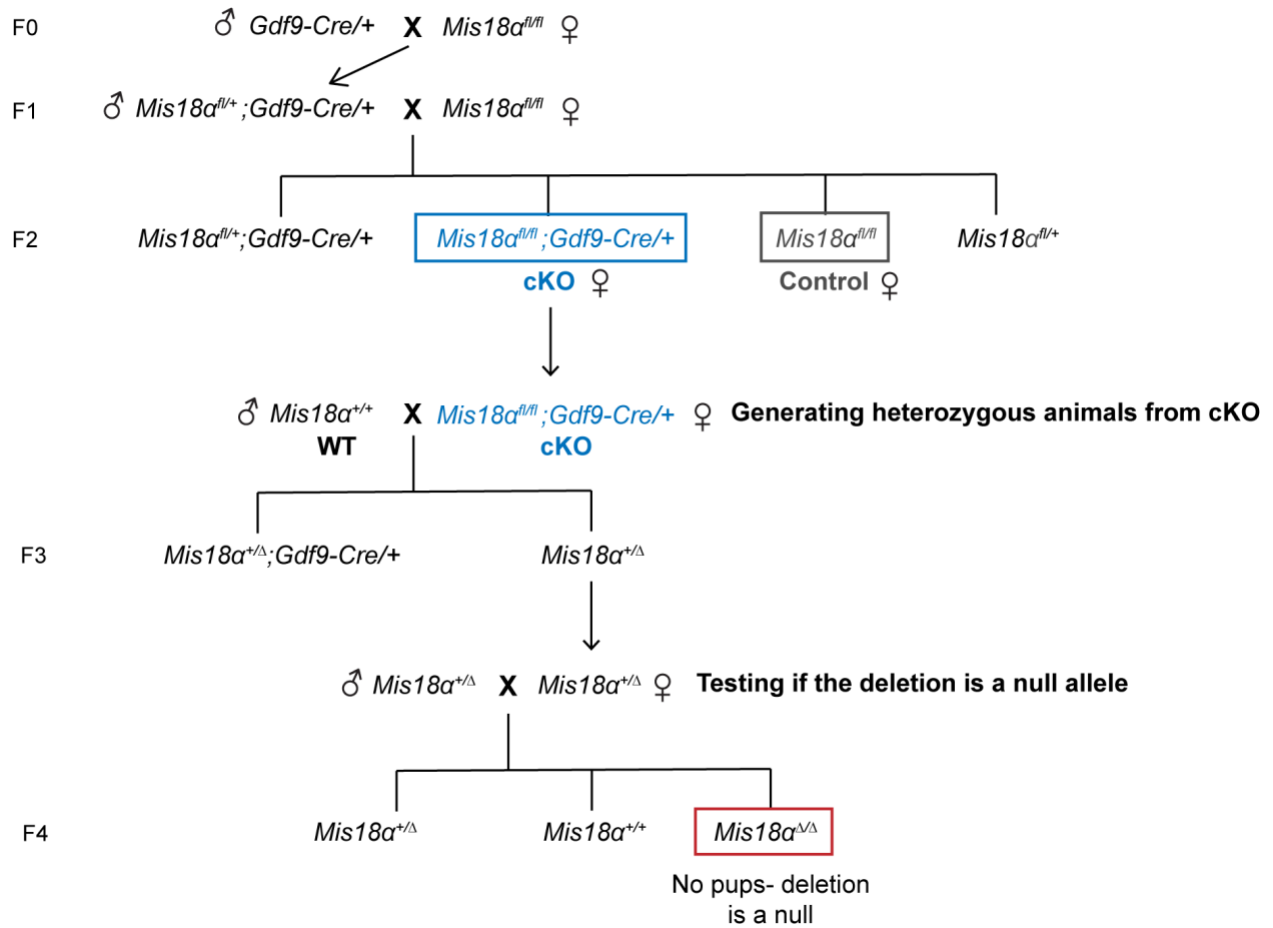

**Figure S2 : Cross scheme to combine the *Cre* recombinases with the *Mis18α* floxed allele. Related to Figures 1- 4.**

Crosses are shown for *Gdf9-Cre*, and equivalent crosses were done for *Zp3-Cre*. The blue and grey boxes designate cKO and control females used for CENP-A measurements in oocytes (Figure 4). The cKO mothers were also used to generate heterozygous animals, which were then utilized to confirm that *Mis18α* deletion is a null allele (also see Figure 1D).

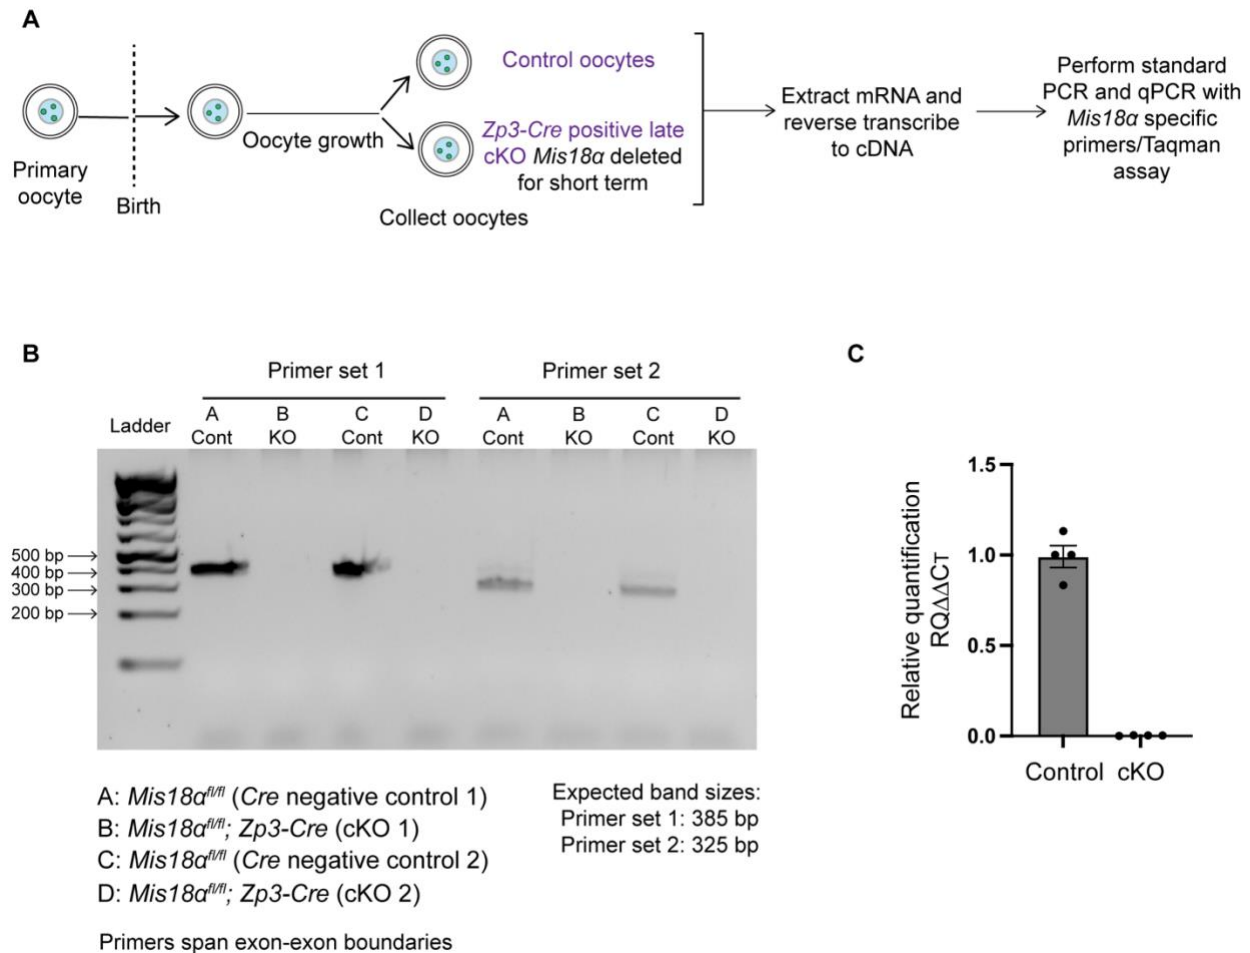

**Figure S3: *Mis18α* gene expression in oocytes. Related to Figure 2.**

(A) Schematic of *Mis18α* gene expression assay for control and late cKO oocytes. (B) Standard RT-PCR gives no amplification from late cKO oocytes compared to the control. (C) Quantification of real time PCR for *Mis18α* gene expression using a Taqman assay against *Mis18α*, with *H2A* as the endogenous control. Expression was quantified using the Livak method<sup>S1</sup>. *Mis18α* mRNA is undetectable by both methods. Error bars: S.E.M.

**Supplemental Reference:**

- S1. Livak, K.J., and Schmittgen, T.D. (2001). Analysis of relative gene expression data using real-time quantitative PCR and the  $2^{-(\Delta\Delta C(T))}$  Method. *Methods* 25, 402–408. 10.1006/meth.2001.1262.
